1                   **Methylotroph Natural Product Identification by Inverse Stable Isotopic Labeling**

2  
3                   Dale A. Cummings Jr., Alice I. Snelling, and Aaron W. Puri\*

4  
5                   Department of Chemistry and the Henry Eyring Center for Cell and Genome Science,  
6                   University of Utah, Salt Lake City, UT 84112

7  
8                   Keywords: natural products, methylotroph, stable isotope, acyl-homoserine lactone, quorum sensing

9  
10  
11                   \*Corresponding author:

12                   Aaron W. Puri

13                   315 S 1400 E Rm 2020

14                   Salt Lake City, UT 84112

15                   USA

16                   (801) 213-1408

17                   a.puri@utah.edu

18

19

20 **Abstract**

21 Natural products are an essential source of bioactive compounds. Isotopic labeling is an effective way to  
22 identify natural products that incorporate a specific precursor; however, this approach is limited by the  
23 availability of isotopically-enriched precursors. We used an inverse stable isotopic labeling approach to  
24 identify natural products by growing bacteria on a  $^{13}\text{C}$ -carbon source and then identifying  $^{12}\text{C}$ -precursor  
25 incorporation by mass spectrometry. We applied this approach to methylotrophs, ecologically important  
26 bacteria predicted to have significant yet underexplored biosynthetic potential. We demonstrate this  
27 method identifies *N*-acyl homoserine lactone quorum sensing signals produced by diverse methylotrophs  
28 grown on three one-carbon compounds. We then apply this approach to simultaneously identify five  
29 uncharacterized signals produced by a methylotroph, and link these compounds to their synthases. We  
30 envision that this method can identify other classes of natural products synthesized by methylotrophs and  
31 other organisms that grow on inexpensive and readily available  $^{13}\text{C}$ -carbon sources.  
32

## 33 Introduction

34  
35 Natural products are an important source of small molecule therapeutics (Newman and Cragg,  
36 2020), agricultural compounds (Cantrell et al., 2012), and other bioactive metabolites. Precursor feeding  
37 studies are commonly used to determine the biosynthetic route to a compound of interest, and can also be  
38 used to identify previously undetected compounds produced by an organism (Gross et al., 2007; Kinnel et  
39 al., 2017; May et al., 2020; Schaefer et al., 2018). However, this approach can be limited by the synthetic  
40 or commercial availability of an isotopically enriched precursor. Alternatively, in an inverse stable  
41 isotopic labeling approach, a fully  $^{13}\text{C}$ -labeled organism is fed a  $^{12}\text{C}$ -biosynthetic precursor to identify  
42 natural products that incorporate this precursor. This incorporation can be detected by a negative shift in  
43 the mass-to-charge ratio ( $m/z$ ) consistent with incorporation of all or part of the  $^{12}\text{C}$ -precursor. With this  
44 approach researchers can use any precursor without having to synthesize or purchase a  $^{13}\text{C}$ -labeled  
45 version. Inverse stable isotopic labeling has been previously used to help determine the biosynthetic  
46 origins of the cofactor pyrroloquinoline quinone (Kleef and Duine, 1988) and an isocyanide-containing  
47 antibiotic (Brady and Clardy, 2005). However, to our knowledge, this approach has not been used to  
48 systematically identify previously uncharacterized natural products.

49 Inverse stable isotopic labeling is particularly well-suited for bacteria that can grow on  
50 inexpensive and readily available  $^{13}\text{C}$  carbon sources, such as methylotrophs. Methylotrophs are bacteria  
51 that grow on reduced compounds with no carbon-carbon bonds, such as methane, methanol, methylamine,  
52 and dimethyl sulfide (Chistoserdova et al., 2009). These organisms play important roles in  
53 biogeochemical cycling and bioremediation (Nisbet et al., 2014; Singh et al., 2010; Stein and Klotz,  
54 2016), as well as plant-microbe interactions (Fedorov et al., 2011). Genomic analysis also predicts that  
55 methylotrophs possess the biosynthetic potential to produce myriad natural products that have not yet  
56 been identified (Puri, 2019). Identifying and characterizing these molecules can help scientists understand  
57 how these important organisms interact with each other and their environment, discover new drug leads,  
58 and help synthetic biologists optimize the desirable activities of methylotrophs using exogenous small  
59 molecules.

60 A benefit of working with methylotrophs is that  $^{13}\text{C}$ -labeled versions of their one-carbon growth  
61 substrates are relatively inexpensive. For this reason, a methylotroph was used to create  $^{13}\text{C}$ -labeled  
62 nucleic acids from  $^{13}\text{C}$ -methanol for DNA structural studies by NMR spectroscopy (Batey et al., 1996).  
63 Stable isotope labeling experiments have also been repeatedly used to identify active methylotrophs in the  
64 environment (Kalyuzhnaya et al., 2008; Radajewski et al., 2000). We sought to take advantage of this  
65 benefit to aid in the discovery of methylotroph natural products.

66 As a proof of concept, we applied this method to identify quorum sensing (QS) signals produced  
67 by methylotrophs. QS is a form of chemical communication used by bacteria to regulate gene expression  
68 in a cell density-dependent manner (Papenfort and Bassler, 2016; Whiteley et al., 2017). In one well-  
69 characterized form of QS, Gram-negative proteobacteria use *N*-acyl-homoserine lactones (acyl-HSLs)  
70 produced by LuxI-family synthases. Acyl-HSL signals vary in their acyl chain, but all possess a common  
71 homoserine lactone derived from methionine via *S*-adenosyl-*L*-methionine (Moré et al., 1996; Schaefer et  
72 al., 1996) (Figure 1A). These signals are detected by LuxR-family receptors, which are also transcription  
73 factors that regulate gene expression upon signal binding. Methylotrophs often possess QS systems, and  
74 several strains have three or more annotated *luxI*-family synthase genes in their genome (Marx et al.,  
75 2012; Poonguzhali et al., 2007). The majority of these genes are predicted to encode CoA-utilizing  
76 enzymes known to produce noncanonical signals (Liao et al., 2018). However, relatively few  
77 methylotroph acyl-HSL signals have been characterized, and many cannot be predicted based on the  
78 amino acid sequences of their synthases (Puri, 2019).

79 Acyl-HSL quorum sensing signals are often detected using reporter assays, in which a strain is  
80 engineered so that the LuxR-family receptor activates the expression of a reporter gene upon signal  
81 binding (Thornhill and McLean, 2018). However, signal detection is dependent on the specificity of the  
82 receptor used, which can lead to false negatives. Reporter assays are often paired with thin layer  
83 chromatography to correlate detected signals with the retention factors of known standards, which can be

84 inaccurate. Liquid chromatography coupled to tandem mass spectrometry (LC-MS/MS) can also be used  
 85 to identify acyl-HSLs based on known fragmentation patterns (Morin et al., 2003; Patel et al., 2016), but  
 86 access to these instruments may still limit routine analysis using this method, and fragmentation patterns  
 87 may differ for some acyl-HSLs. For example, the aryl-HSL *p*-coumaroyl-HSL does not produce the

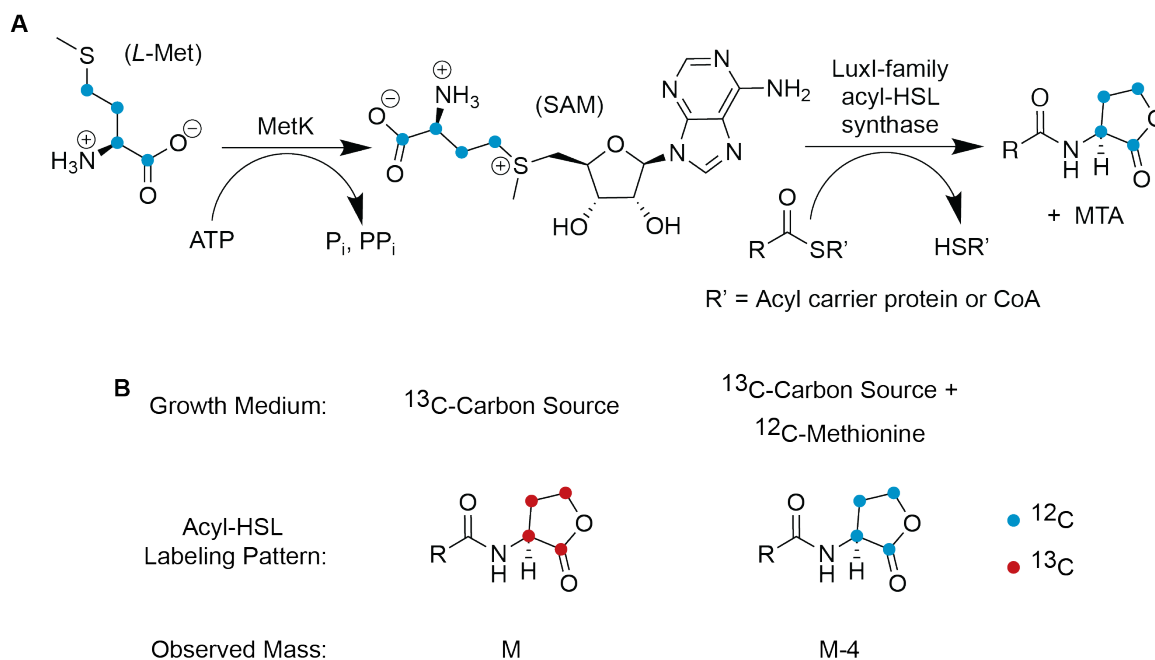

**Figure 1.** (A) Acyl-HSL biosynthesis incorporates methionine. *L*-Met: *L*-methionine. MetK: *S*-adenosyl-*L*-methionine synthase. SAM: *S*-adenosyl-*L*-methionine. MTA: 5'-methylthioadenosine. (B) The inverse stable isotope labeling approach applied to acyl-HSL signals. Note that the acyl carbonyl carbon is not denoted as <sup>12</sup>C or <sup>13</sup>C as it can be derived from endogenous or exogenous sources and therefore may or may not be labeled when an organism is grown on a <sup>13</sup>C-carbon source.

88 characteristic *m/z* 102 HSL fragment (Schaefer et al., 2008).

89 Detection of methionine incorporation into the common HSL portion of acyl-HSLs is a more  
 90 generalizable method that has been successfully used to detect QS signals (Ahlgren et al., 2011; Eberhard  
 91 et al., 1991; Lindemann et al., 2011; Schaefer et al., 2018). <sup>14</sup>C-labeled methionine can be used in feeding  
 92 studies to indirectly identify signals by comparing radioactivity retention via HPLC to the retention times  
 93 (RTs) of known acyl-HSL standards. We sought to build off of this approach by using an inverse stable  
 94 isotopic labeling method with <sup>12</sup>C-methionine to identify QS signals produced by methylotrophs (Figure  
 95 1B). We show this method works with three <sup>13</sup>C-labeled one-carbon sources (methane, methanol, and  
 96 methylamine) in two diverse methylotrophs. We then apply the method to simultaneously identify five  
 97 QS signals produced by *Methylorubrum rhodinum* DSM2163 (Green and Ardley, 2018), including three  
 98 which could not be predicted based on sequence homology to characterized QS systems. Finally, we link  
 99 these signals to the synthase genes responsible for their production.

100

## 101 Results

102

### 103 *Inverse stable isotopic labeling identifies previously characterized acyl-HSL signals*

104

105 To verify the utility of the inverse stable isotopic labeling approach for identifying natural  
 106 products, we began by applying it to a methylotroph that produces acyl-HSL signals that have been

107 previously characterized. The methanol-oxidizing *Methylorubrum extorquens* PA1 produces a single  
108 LuxI-family signal synthase, MlaI, with 100% amino acid sequence identity to the characterized version  
109 found in *Methylorubrum extorquens* AM1 (Marx et al., 2012; Nieto Penalver et al., 2006). Vorholt and  
110 coworkers previously demonstrated that MlaI produces two QS signals with unsaturated acyl chains: *N*-  
111 (2-*trans*-7-*cis*-tetradecenoyl)-*L*-homoserine lactone (referred to as 2*E*,7*Z*-C<sub>14:2</sub>-HSL) and *N*-(7-*cis*-  
112 tetradecenoyl)-*L*-homoserine lactone (7*Z*-C<sub>14:1</sub>-HSL) (Nieto Penalver et al., 2006) (Figure 2).  
113

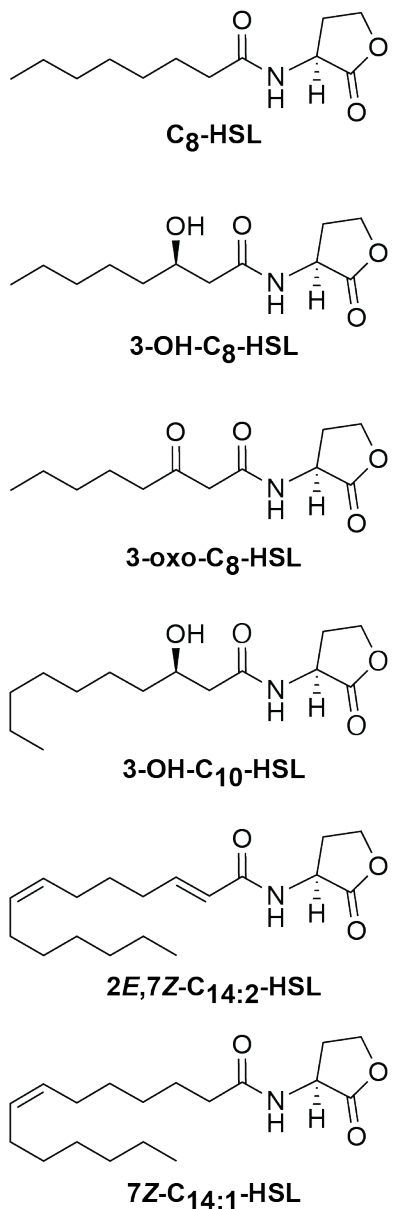

**Figure 2.** Acyl-HSLs identified in this work. Stereochemistry was not determined and is inferred based on previous studies. All biologically produced acyl-HSLs that have been characterized have homoserine lactones with an *L* stereocenter. The hydroxyls in 3-OH-C<sub>8</sub>-HSL and 3-OH-C<sub>10</sub>-HSL are shown as 3*R* because their synthases are annotated as acyl carrier protein (ACP)-linked (KEGG Orthology term K13060) and these enzymes use acyl-ACPs from fatty acid biosynthesis (Hoang et al., 2002; Val and Cronan, 1998) where the stereoselective  $\beta$ -ketoacyl acyl carrier protein reductase FabG produces 3*R*-OH fatty acyl chains (Volpe and Vagelos, 1976).

114  
115 In order to streamline the inverse stable isotopic labeling procedure for future screening of  
116 diverse bacteria with potentially different growth rates, we chose to add the <sup>12</sup>C-methionine precursor at  
117 the beginning of growth. We grew the *M. extorquens* PA1 $\Delta$ *cel* strain CM2730 (referred to as PA1)  
118 (Delaney et al., 2013) with <sup>13</sup>C-methanol and different concentrations of <sup>12</sup>C-methionine. We extracted the  
119 supernatant with acidified ethyl acetate, analyzed the extract by LC-MS, and detected features using the  
120 program MZmine2 (Pluskal et al., 2010). We identified two features with *m/z* values of 322 and 324,

121 which correspond to protonated versions of 2*E*,7*Z*-C<sub>14:2</sub>-HSL and 7*Z*-C<sub>14:1</sub>-HSL, respectively, that have  
 122 incorporated the four carbons of <sup>12</sup>C-methionine but are otherwise fully <sup>13</sup>C-labeled (Figure S1 and Table  
 123 1). When we cultured PA1 with <sup>12</sup>C-methanol as a control, we identified features with the same RTs but  
 124 with *m/z* values of 308 and 310, which correspond to the protonated <sup>12</sup>C-versions of 2*E*,7*Z*-C<sub>14:2</sub>-HSL and  
 125 7*Z*-C<sub>14:1</sub>-HSL, respectively. Together, these results show that the inverse labeling approach can be used to  
 126 correctly identify acyl-HSLs.

127 The methionine titration indicated that the optimal concentration of the <sup>12</sup>C-methionine precursor  
 128 was 0.5 mM when added at the beginning of growth (Figure S1). Higher-than-necessary label  
 129 concentrations may result in slowed growth or nonspecific incorporation of <sup>12</sup>C-precursor carbons due to  
 130 toxicity or methionine metabolism, respectively. We did not observe any fully <sup>13</sup>C-labeled acyl-HSLs  
 131 using our workflow upon addition of <sup>12</sup>C-methionine at any concentration we tested. This indicates that  
 132 for acyl-HSL natural products it is necessary to include a separate <sup>13</sup>C-carbon source condition with no  
 133 precursor as a benchmark to identify <sup>12</sup>C-enriched features in the <sup>13</sup>C-carbon source + <sup>12</sup>C-methionine  
 134 condition.  
 135

**Table 1.** Identification of acyl-HSL signals using the inverse stable isotopic labeling approach. Max paired *m/z* refers to the maximum feature *m/z* observed in that condition where the desired *m/z* difference of four units was observed compared to the other <sup>13</sup>C-condition. Note the RT differences between PA1 and DSM2163 for 2*E*,7*Z*-C<sub>14:2</sub>-HSL and 7*Z*-C<sub>14:1</sub>-HSL were resolved when smaller injection volumes were used after initial screening (see Figure S3).

| Strain                           | Carbon source | <sup>12</sup> C-carbon source |            | <sup>13</sup> C-carbon source |                       | <sup>13</sup> C-carbon source + <sup>12</sup> C-methionine |                       | # Pairs detected | Identified Acyl-HSL                            |
|----------------------------------|---------------|-------------------------------|------------|-------------------------------|-----------------------|------------------------------------------------------------|-----------------------|------------------|------------------------------------------------|
|                                  |               | RT (min)                      | <i>m/z</i> | RT (min)                      | Max paired <i>m/z</i> | RT (min)                                                   | Max paired <i>m/z</i> |                  |                                                |
| <i>M. extorquens</i><br>PA1      | Methanol      | 23.0                          | 310        | 23.0                          | 328                   | 23.1                                                       | 324                   | 6                | 7 <i>Z</i> -C <sub>14:1</sub> -HSL             |
|                                  |               | 22.7                          | 308        | 22.7                          | 326                   | 22.8                                                       | 322                   | 5                | 2 <i>E</i> ,7 <i>Z</i> -C <sub>14:2</sub> -HSL |
|                                  | Methylamine   | 23.1                          | 310        | 23.1                          | 327                   | 23.2                                                       | 323                   | 5                | 7 <i>Z</i> -C <sub>14:1</sub> -HSL             |
|                                  |               | 22.8                          | 308        | 22.8                          | 325                   | 22.9                                                       | 321                   | 5                | 2 <i>E</i> ,7 <i>Z</i> -C <sub>14:2</sub> -HSL |
| <i>M. tundripaludum</i><br>21/22 | Methane       | 15.6                          | 272        | 15.6                          | 286                   | 15.6                                                       | 282                   | 1                | 3-OH-C <sub>10</sub> -HSL                      |
| <i>M. rhodinum</i><br>DSM2163    | Methanol      | 22.9                          | 308        | 22.9                          | 326                   | 22.8                                                       | 322                   | 5                | 2 <i>E</i> ,7 <i>Z</i> -C <sub>14:2</sub> -HSL |
|                                  |               | 23.2                          | 310        | 23.2                          | 328                   | 23.1                                                       | 324                   | 5                | 7 <i>Z</i> -C <sub>14:1</sub> -HSL             |
|                                  |               | 12.0                          | 244        | 12.0                          | 256                   | 12.0                                                       | 252                   | 4                | 3-OH-C <sub>8</sub> -HSL                       |
|                                  |               | 15.6                          | 228        | 15.5                          | 240                   | 15.5                                                       | 236                   | 3                | C <sub>8</sub> -HSL                            |
|                                  |               | 12.7                          | 242        | 12.7                          | 254                   | 12.7                                                       | 250                   | 1                | 3-oxo-C <sub>8</sub> -HSL                      |

137 In addition to detecting fully  $^{13}\text{C}$ -labeled acyl-HSLs in the PA1 culture grown on  $^{13}\text{C}$ -methanol  
138 without addition of the  $^{12}\text{C}$ -precursor, we also detected several features with the same RT but stepwise  
139 decreases of one  $m/z$  unit. We also identified the same spectral pattern in the  $^{13}\text{C}$ -methanol +  $^{12}\text{C}$ -  
140 methionine condition, but decreased by four  $m/z$  units, corresponding to  $^{12}\text{C}$ -methionine incorporation  
141 (Figure S2). Many methylotrophs in the alphaproteobacteria class, including *M. extorquens*, assimilate  
142 reduced one-carbon compounds such as methanol using the serine cycle (Chistoserdova et al., 2009). In  
143 the serine cycle, half of the carbon input is derived from carbon dioxide, which we did not label in our  
144 system and could therefore result in incomplete  $^{13}\text{C}$ -labeling of metabolites of interest. The fact that we do  
145 observe fully  $^{13}\text{C}$ -labeled acyl-HSLs is likely because  $^{13}\text{C}$ -carbon dioxide is rapidly produced by the  
146 bacterium's central metabolism. When we grew PA1 on the carbon source  $^{13}\text{C}$ -methylamine, we did not  
147 identify complete  $^{13}\text{C}$ -labeling but this did not affect our ability to identify a decrease of four  $m/z$  units  
148 corresponding with  $^{12}\text{C}$ -methionine incorporation (Table 1) because the extent of acyl-HSL  $^{13}\text{C}$ -labeling  
149 was consistent between the  $^{13}\text{C}$ -methylamine and  $^{13}\text{C}$ -methylamine +  $^{12}\text{C}$ -methionine conditions.

150 We wrote a Python script to identify pairs of features with matching RTs and a decrease of four  
151  $m/z$  units in the  $^{13}\text{C}$ -carbon source +  $^{12}\text{C}$ -methionine condition compared to the  $^{13}\text{C}$ -carbon source condition  
152 (see Methods). For the RTs corresponding to *2E,7Z-C*<sub>14:2</sub>-HSL and *7Z-C*<sub>14:1</sub>-HSL, our script identifies  
153 several pairs of features with the desired  $m/z$  difference due to the aforementioned incomplete labeling  
154 (Table 1). Notably, out of all the feature pairs identified in the PA1 culture extract, the two acyl-HSL  
155 signals have the most identified pairs that correspond with a single feature at the same RT in the  $^{12}\text{C}$ -  
156 carbon source control (Table S1). We can therefore use this knowledge to prioritize identified features  
157 that are more likely to be acyl-HSLs.

158 In order to determine if this method is more broadly applicable, we applied it to the methane-  
159 oxidizing bacterium *Methylobacter tundripaludum* 21/22 (21/22), which was previously shown to  
160 produce the QS signal *N*-(3-hydroxydecanoyl)-*L*-homoserine lactone (3-OH-*C*<sub>10</sub>-HSL) (Puri et al., 2017)  
161 (Figure 2). When we grew 21/22 with  $^{13}\text{C}$ -methane, we identified a feature with an  $m/z$  value of 286,  
162 corresponding to the protonated and fully  $^{13}\text{C}$ -labeled 3-OH-*C*<sub>10</sub>-HSL. We detected a feature with the  
163 same RT and a decrease of four  $m/z$  units in the  $^{13}\text{C}$ -methane +  $^{12}\text{C}$ -methionine condition (Table 1),  
164 indicating  $^{12}\text{C}$ -methionine incorporation. These results show that this method can be broadly applied, as it  
165 works with the methane-oxidizing gammaproteobacterium 21/22 as well as the methanol- and  
166 methylamine-oxidizing alphaproteobacterium PA1.

167  
168 *Simultaneous identification of five acyl-HSL signals produced by the methylotroph M. rhodinum*  
169 *DSM2163*

170  
171 Next, we applied the inverse stable isotopic labeling method to identify the signals produced by  
172 the methanol-oxidizer *M. rhodinum* DSM2163 (DSM2163), which possesses three predicted LuxI-family  
173 acyl-HSL synthases. A previous study used a reporter assay to speculate which acyl-HSL signals are  
174 produced by this strain, but the exact signals were not identified (Poonguzhali et al., 2007). We identified  
175 several features with the signature decrease of four  $m/z$  units when DSM2163 was grown on  $^{13}\text{C}$ -methanol  
176 +  $^{12}\text{C}$ -methionine compared to  $^{13}\text{C}$ -methanol alone. Three of these features corresponded to the signals *N*-  
177 octanoyl-*L*-homoserine lactone (*C*<sub>8</sub>-HSL), *N*-(3-hydroxyoctanoyl)-*L*-homoserine lactone (3-OH-*C*<sub>8</sub>-HSL),  
178 and *N*-(3-oxooctanoyl)-*L*-homoserine lactone (3-oxo-*C*<sub>8</sub>-HSL) (Figure 2 and Table 1), which we  
179 confirmed by high-resolution mass spectrometry (Table S2) as well as by verifying these compounds have  
180 identical LC-MS retention times to commercial standards (Figures S3A-C).

181 Our method also identified features in the DSM2163 culture corresponding to the signals *2E,7Z-*  
182 *C*<sub>14:2</sub>-HSL and *7Z-C*<sub>14:1</sub>-HSL, and these signals had identical LC-MS retention times (Figures S3D and  
183 S3E) and high-resolution MS/MS spectra (Table S3) compared to the signals produced by PA1. This is  
184 consistent with the fact that one of the DSM2163 acyl-HSL synthases shares 91% amino acid identity  
185 with MlaI from PA1. We were therefore able to use the inverse labeling method to simultaneously  
186 identify a total of five acyl-HSL QS signals produced by the methylotroph DSM2163.

187

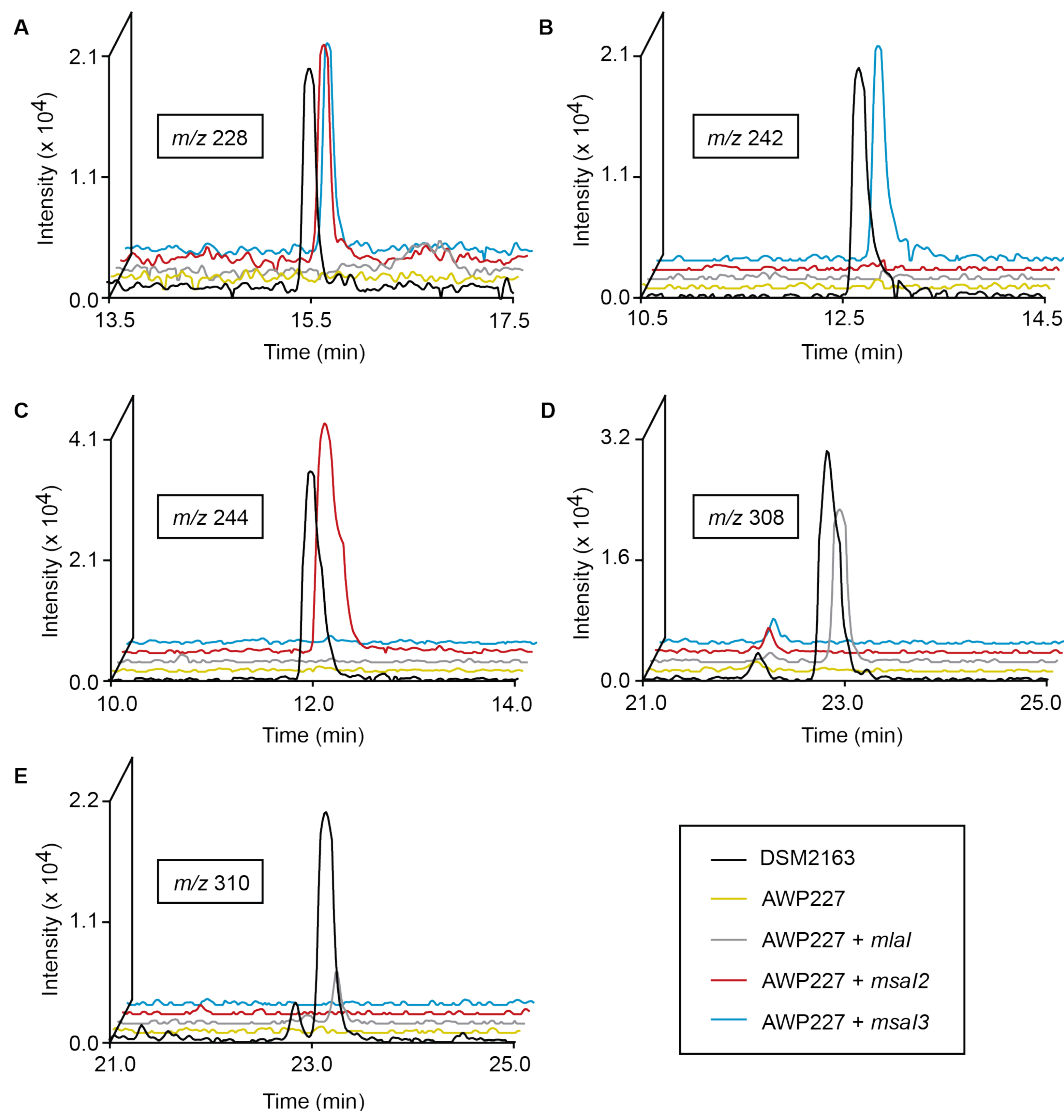

**Figure 3.** Linking *M. rhodinum* DSM2163 LuxI-family acyl-HSL synthases with their products. Extracted ion chromatograms of supernatant extracts for the listed strains for the listed *m/z* ranges (A) 228.0-228.5, corresponding to C<sub>8</sub>-HSL, (B) 242.0-242.5, corresponding to 3-oxo-C<sub>8</sub>-HSL, (C) 244.0-244.5, corresponding to 3-OH-C<sub>8</sub>-HSL, (D) 308.0-308.5, corresponding to 2*E*,7*Z*-C<sub>14:2</sub>-HSL, and (E) 310.0-310.5, corresponding to 7*Z*-C<sub>14:1</sub>-HSL.

188  
189  
190  
191  
192  
193  
194  
195  
196  
197

### *Heterologous expression links acyl-HSL signals with their synthases*

Finally, we constructed a strain for heterologous expression of *luxI*-family acyl-HSL synthase genes to link synthases with their signal products. We created an unmarked deletion strain of PA1 called AWP227 that no longer produces acyl-HSL signals by knocking out the acyl-HSL receptor gene *mlaR* and the synthase gene *mlaI*. We then used AWP227 to express each of the three DSM2136 synthase genes separately on a plasmid to determine which signals are produced by each synthase.



198 When we heterologously expressed the DSM2163 synthase gene Ga0373200\_3300, we observed  
199 features corresponding to production of C<sub>8</sub>-HSL (Figure 3A) and 3-oxo-C<sub>8</sub>-HSL (Figure 3B) that were not  
200 present in the no-plasmid AWP227 control. Heterologous expression of Ga0373200\_1920 also resulted in  
201 production of C<sub>8</sub>-HSL (Figure 3A), as well as 3-OH-C<sub>8</sub>-HSL (Figure 3C). We also confirmed that the  
202 synthase with 91% amino acid identity to MlaI (Ga0373200\_956) produces the signals 2E,7Z-C<sub>14:2</sub>-HSL  
203 and 7Z-C<sub>14:1</sub>-HSL (Figures 3D and 3E). All gene locus tags refer to the Joint Genome Institute Integrated  
204 Microbial Genomes & Microbiomes data management system (JGI IMG/M) (Chen et al., 2021). Vorholt  
205 and coworkers previously named a LuxI-family synthase that produces *N*-hexanoyl-*L*-homoserine lactone  
206 (C<sub>6</sub>-HSL) and C<sub>8</sub>-HSL MsaI for *Methylobacterium* short-chain acyl-HSLs (Nieto Penalver et al., 2006).  
207 We therefore name Ga0373200\_1920 MsaI2 and Ga0373200\_3300 MsaI3 based on our results, and also  
208 refer to Ga0373200\_956 as MlaI in *M. rhodinum* DSM2163.

209

## 210 Discussion

211

212 We used an inverse stable isotopic labeling approach to rapidly identify acyl-HSL natural  
213 products made by methylotrophic bacteria. This method was effective using three different <sup>13</sup>C-one-  
214 carbon sources (methane, methanol, and methylamine) and for diverse methylotrophs including both a  
215 methane-oxidizing gammaproteobacterium and two species of alphaproteobacteria. Together these results  
216 show the broad applicability of this method for identifying natural products by growing different bacteria  
217 on a <sup>13</sup>C-carbon source and feeding readily available <sup>12</sup>C-precursors.

218 The inverse stable isotopic labeling method can be applied in the future to identify other classes  
219 of natural products based on a common precursor, including those which may not be readily available in  
220 an isotopically labeled form. Feeding studies using isotopically enriched precursors are extremely  
221 widespread, and the inverse stable isotopic labeling method is applicable in any situation where a  
222 traditional method can be used. However, this method is especially well-suited for organisms that grow  
223 on inexpensive <sup>13</sup>C-carbon sources, including methanotrophs and autotrophs such as cyanobacteria, which  
224 are known to have significant biosynthetic potential (Dittmann et al., 2015).

225 A strength of stable isotopic labeling is that it can be performed using unit-resolution mass  
226 spectrometers, which are widely available to researchers for routine analysis. This approach complements  
227 existing LC-MS/MS based methods for acyl-HSL identification, as fragmentation patterns may change  
228 based on signal structure. Notably, the characteristic *m/z* 102 HSL fragment was not one of the top twenty  
229 signals detected in the tandem mass spectra of 2E,7Z-C<sub>14:2</sub>-HSL, likely because it contains an  $\alpha$ ,  $\beta$   
230 unsaturated acyl chain (Table S3). More broadly, the inverse stable isotopic labeling approach can also be  
231 applied using LC-MS/MS and techniques such as feature-based molecular networking (Klitgaard et al.,  
232 2015; Nothias et al., 2020) to identify precursor incorporation into specific molecular fragments. The  
233 combination of these techniques in the future will enable researchers to gain richer information about  
234 identified natural products early in the discovery process.

235 The increase in metagenomic sequencing of microbial communities has led to an increased  
236 demand for predicting how these organisms interact in the environment. Methods for rapidly determining  
237 the QS signal(s) produced by an organism enable researchers to link these compounds to specific gene  
238 sequences, and in turn to hypothesize how these bacteria are interacting *in situ*. The acyl-HSL signals  
239 produced by MsaI2 and MsaI3 could not be predicted on the basis of amino acid sequence alone. MsaI2  
240 shares only 58% amino acid identity with RaiI from *Rhizobium etli* ISP42, which was reported to produce  
241 C<sub>8</sub>-HSL and 3-OH-C<sub>8</sub>-HSL (Pérez-Montaña et al., 2011). MsaI3 does not share >50% amino acid identity  
242 with any currently characterized LuxI-family synthases. During heterologous expression of MsaI2 and  
243 MsaI3 we determined that both synthases produce significant amounts of C<sub>8</sub>-HSL (Figures 3 and S3). It is  
244 therefore unclear if one or both of these synthases are responsible for the C<sub>8</sub>-HSL detected in the  
245 DSM2163 culture. Together, these annotations will aid in the future prediction of QS signal production  
246 from bacterial genome sequences. Furthermore, our heterologous expression strain can be used in the  
247 future to identify QS signals produced by synthases from non-methylotrophic species using the inverse  
248 labeling approach.

249  
250  
251  
252  
253  
254  
255  
256  
257  
258  
259

## **Significance**

Natural products are a vetted source of bioactive compounds with medicinal and agricultural value. Isotopic labeling is often used to identify and characterize natural products, however the labeled precursors required for these studies can be difficult to obtain commercially or synthetically. Here we use an inverse stable isotopic labeling approach to identify natural products via incorporation of unlabeled precursors, which significantly expands precursor availability for natural product studies. This approach is broadly applicable to bacteria that grow on inexpensive labeled carbon sources such as methylotrophs, and can be used to rapidly identify natural products known to incorporate a particular precursor.

## 260 **Methods**

261

### 262 *Key Reagents*

263 <sup>13</sup>C-labeled methanol, methane, and methylamine were purchased from Cambridge Isotope Laboratories.  
264 C<sub>8</sub>-HSL was purchased from Millipore Sigma. All other acyl-HSLs were purchased from Cayman  
265 Chemical.

266

### 267 *Routine bacterial culturing*

268 Strains used in this study are listed in Table S4. *Escherichia coli* strains were grown in lysogeny broth  
269 (LB) at 37°C. *M. extorquens* PA1 and *M. rhodinum* DSM2163 were grown at 30 °C in modified  
270 ammonium mineral salts (AMS) medium (Whittenbury et al., 1970), with the addition of 0.1% (m/v)  
271 yeast extract for strain DSM2163. AMS contains 0.2 g/L MgSO<sub>4</sub>·7H<sub>2</sub>O, 0.2 g/L CaCl<sub>2</sub>·6H<sub>2</sub>O, 0.5 g/L  
272 NH<sub>4</sub>Cl, 30 μM LaCl<sub>3</sub>, and 1X trace elements. 500X trace elements contains 1.0 g/L Na<sub>2</sub>-EDTA, 2.0 g/L  
273 FeSO<sub>4</sub>·7H<sub>2</sub>O, 0.8 g/L ZnSO<sub>4</sub>·7H<sub>2</sub>O, 0.03 g/L MnCl<sub>2</sub>·4H<sub>2</sub>O, 0.03 g/L H<sub>3</sub>BO<sub>3</sub>, 0.2 g/L CoCl<sub>2</sub>·6H<sub>2</sub>O, 0.6 g/L  
274 CuCl<sub>2</sub>·2H<sub>2</sub>O, 0.02 g/L NiCl<sub>2</sub>·6H<sub>2</sub>O, and 0.05 g/L Na<sub>2</sub>MoO<sub>4</sub>·2H<sub>2</sub>O. Final concentrations of 4 mM  
275 phosphate buffer pH 6.8 and 50 mM <sup>12</sup>C- or <sup>13</sup>C-methanol were added prior to use and cultures were  
276 shaken at 200 rpm. *M. tundripaludum* 21/22 was grown in modified nitrate mineral salts (NMS) medium  
277 (Whittenbury et al., 1970), which is the same as AMS with 1 g/L KNO<sub>3</sub> substituted for the NH<sub>4</sub>Cl. *M.*  
278 *tundripaludum* 21/22 was cultured at room temperature (22-24°C) in an atmosphere of 50% (v/v) methane  
279 in air. For routine culturing, plates were incubated in sealed jars while liquid cultures were grown in 18-  
280 by 150-mm tubes sealed with rubber stoppers and aluminum seals shaken at 200 rpm.

281

### 282 *Plasmid construction*

283 Plasmids used in this study are listed in Table S5. Primers used in this study are listed in Table S6. All  
284 plasmids were constructed using Gibson Assembly (Gibson et al., 2009) and selection was performed  
285 with kanamycin (50 μg/mL) both in *E. coli* and *M. extorquens* PA1 strains.

286

### 287 *Genetic manipulation*

288 Genetic manipulation of strain PA1Δ*cel* (CM2730) and the derivative strain AWP227 was performed at  
289 30°C. Verified plasmids were conjugated into these strains using the *E. coli* donor S17-1 (Simon et al.,  
290 1983). 500 μL of exponentially growing cultures (OD 0.4-0.6) of the donor and recipient strains were  
291 pelleted at 16,100 rcf for one minute and resuspended in 500 μL sterile ultrapure H<sub>2</sub>O. These strains were  
292 then pelleted again and the two pellets were combined in a total volume of 50 μL sterile ultrapure H<sub>2</sub>O.  
293 Next, the entire mixture was spotted onto an AMS agar plate containing 50 mM methanol and 10% (v/v)  
294 nutrient broth and incubated for two days. Successful conjugants were selected on AMS plates containing  
295 kanamycin (50 μg/mL). To construct the unmarked deletion mutant AWP227, kanamycin-resistant  
296 integrants (single crossovers) were restreaked and then plated on an AMS plate containing 50 mM  
297 methanol and 1% (m/v) sucrose for counterselection. The resulting colonies were screened for double  
298 crossovers by kanamycin sensitivity and colony PCR before the final mutant was verified by Sanger  
299 sequencing.

300

### 301 *Inverse labeling experiments*

302 Exponentially growing bacterial cultures were pelleted at 16,100 rcf for one minute and resuspended in  
303 growth medium with no carbon source. Subsequently, three separate six milliliter cultures were  
304 inoculated with the resuspended strain at a starting OD of 0.02. The <sup>12</sup>C-carbon source was added to one  
305 culture, the <sup>13</sup>C-carbon source to the second, and the <sup>13</sup>C-carbon source plus 500 nM <sup>12</sup>C-methionine to  
306 the last culture. The carbon sources used were 50 mM methanol, 50 mM methylamine, or 50% (v/v)  
307 methane. Cultures were grown until reaching stationary phase (OD of approximately 0.8) and then were  
308 centrifuged at 4,800 rcf for ten minutes. The resulting supernatant was extracted twice with an equal  
309 volume of ethyl acetate containing 0.01% acetic acid, and the combined organic extract was evaporated to  
310 dryness using a nitrogen stream and stored at -20°C until analysis by LC-MS.

311  
312  
313  
314  
315  
316  
317  
318  
319  
320  
321  
322  
323  
324  
325  
326  
327  
328  
329  
330  
331  
332  
333  
334  
335  
336  
337  
338  
339  
340  
341  
342  
343  
344  
345  
346  
347  
348  
349  
350  
351  
352  
353  
354  
355  
356  
357  
358  
359  
360  
361

### *LC-MS for acyl-HSL signal detection*

Dried culture supernatant extracts were resuspended in 200 microliters of 1:1 water:acetonitrile, and subsequently 65 microliters were injected onto an Agilent 1260 Infinity liquid chromatography system connected to an Agilent 6120 single quadrupole mass spectrometer operating with positive polarity and a mass range of 150-1500 *m/z*. A Waters Xselect HSS T3 column (2.5  $\mu$ m particle size, 2.1 mm x 50 mm) held at 30 °C was used for reverse phase separation with a flow rate of 0.4 mL/min. Solvent A: Water + 0.1 % formic acid, Solvent B: Acetonitrile + 0.1% formic acid. Gradient: 0-2 min, 0% B. 2-32 min, 0-100% B. 32-35 min, 100% B. 35-36 min, 100-0% B. 36-38 min, 0% B. The limit of detection for known standards on this setup was 125 nM (Figure S4), which corresponds to a limit of approximately 5 nM in the original bacterial culture.

### *LC-MS analysis*

Raw data files in netCDF format were exported using Agilent OpenLab CDS (rev C.01.07). Features were detected using MZmine version 2.53 (Pluskal et al., 2010) using the following workflow: 1. Mass detection (centroid, noise level 1.0E3). 2. ADAP chromatogram builder (minimum group size 5 scans, group intensity threshold 1.0E3, min highest intensity 5.0E3), *m/z* tolerance 0.3) (Myers et al., 2017). 3. Chromatogram deconvolution (local minimum search, chromatogram threshold 30%, search minimum 0.1 min, minimum relative height 10%, minimum absolute height 6.0E3, minimum ratio of peak top/edge 2, peak duration 0-2 min). 4. Adduct search (RT tolerance 0.1 min, adducts [M+Na-H] and [M+NH<sub>3</sub>] selected, *m/z* tolerance 0.2, max relative peak height 200%). 5. Feature list rows filter (remove identified adducts). Subsequently, isotopes were removed from <sup>12</sup>C samples using the Isotopic peaks grouper (*m/z* tolerance 0.2, retention time tolerance 0.1 min, monotonic shape required, maximum charge 3, representative isotope most intense), and the three feature lists were aligned in the order <sup>13</sup>C-carbon source + <sup>12</sup>C-methionine, <sup>12</sup>C-carbon source, <sup>13</sup>C-carbon source using the Join aligner (*m/z* tolerance 0.3, weight of *m/z* 50, retention time tolerance 0.1 min, weight for retention time 50). The alignment was exported in .csv format with the row retention time as a common element and peak *m/z* as the data file element. Features containing the desired four *m/z* unit difference in the <sup>13</sup>C-carbon source and <sup>13</sup>C-carbon source + <sup>12</sup>C-methionine samples were then detected using a custom Python script (available at <https://github.com/purilab/inverse>).

### *HRMS*

Mass spectrometry data were collected using a Waters Acquity I-class ultra-high pressure liquid chromatograph coupled to a Waters Xevo G2-S quadrupole time-of-flight mass spectrometer. An Acquity UPLC BEH C18 column (2.1 x 50 mm) was used for separation and resolving samples. Solvent A: Water + 0.1 % formic acid, Solvent B: Acetonitrile + 0.1% formic acid. The sample was eluted from the column using a ten minute linear solvent gradient: 0-0.1 min, 1% B; 0.1 - 10 min, 100% B. The solvent flow rate was 0.45 mL per minute. Mass spectra were collected in positive ion mode, with following parameters: 3 kV capillary voltage; 25 V sampling cone voltage; 150 °C source temperature; 500 °C desolvation temperature; nitrogen desolvation at 800 L/hr. The fragmentation spectra were collected using the same parameters with a 10-25 eV collision energy ramp. The lockspray solution was 200 pg/ $\mu$ L leucine enkephalin. The lockspray flow rate was 6  $\mu$ L/min. Sodium formate was used to calibrate the mass spectrometer. The acquired mass spectra were processed using Masslynx 4.1 software.

### **Acknowledgements**

This work is dedicated to Mary E. Lidstrom (University of Washington) for her 70<sup>th</sup> birthday. This work was supported by National Institutes of Health grant R00 GM118762 (to AWP). We thank members of the Puri Lab for reading the manuscript and for helpful discussions. We thank Yanfen Fu (Facebook, Inc.) for useful discussions about methylotroph metabolism and isotopic labeling that led to this project. We

362 thank N. Cecilia Martinez-Gomez (UC Berkeley) for *M. extorquens* PA1  $\Delta cel$  strain CM2730, and Ming  
363 Hammond (University of Utah) for generously sharing her LC-MS system and other lab equipment. We  
364 thank Daniel Petras (University of Tübingen) for sharing Python code and for helpful discussions about  
365 LC-MS analysis.

366  
367

#### 368 **Author Contributions**

369

370 AWP and DAC designed the experiments. DAC, AIS, and AWP performed the experiments. AWP wrote  
371 the manuscript. AWP and DAC edited the manuscript. All authors read and approved of the final version  
372 of the manuscript.

373

374

#### 375 **Conflicts of Interest**

376

377 The authors declare no conflicts of interest.

378

379 **References**

- 380
- 381 Ahlgren, N.A., Harwood, C.S., Schaefer, A.L., Giraud, E., and Greenberg, E.P. (2011). Aryl-homoserine  
382 lactone quorum sensing in stem-nodulating photosynthetic bradyrhizobia. *Proc. Natl. Acad. Sci.* *108*,  
383 7183–7188.
- 384 Batey, R.T., Cloutier, N., Mao, H., and Williamson, J.R. (1996). Improved large scale culture of  
385 *Methylophilus methylotrophus* for <sup>13</sup>C/<sup>15</sup>N labeling and random fractional deuteration of ribonucleotides.  
386 *Nucleic Acids Res.* *24*, 4836–4837.
- 387 Brady, S.F., and Clardy, J. (2005). Systematic Investigation of the *Escherichia coli* Metabolome for the  
388 Biosynthetic Origin of an Isocyanide Carbon Atom. *Angew. Chem. Int. Ed.* *44*, 7045–7048.
- 389 Cantrell, C.L., Dayan, F.E., and Duke, S.O. (2012). Natural products as sources for new pesticides. *J. Nat.*  
390 *Prod.* *75*, 1231–1242.
- 391 Chen, I.-M.A., Chu, K., Palaniappan, K., Ratner, A., Huang, J., Huntemann, M., Hajek, P., Ritter, S.,  
392 Varghese, N., Seshadri, R., Roux, S., Woyke, T., Eloie-Fadrosch, E.A., Ivanova, N.N., and Kyrpides, N.C.  
393 (2021). The IMG/M data management and analysis system v.6.0: new tools and advanced capabilities.  
394 *Nucleic Acids Res.* *49*, D751–D763.
- 395 Chistoserdova, L., Kalyuzhnaya, M.G., and Lidstrom, M.E. (2009). The Expanding World of  
396 Methylophilic Metabolism. *Annu. Rev. Microbiol.* *63*, 477–499.
- 397 Delaney, N.F., Kaczmarek, M.E., Ward, L.M., Swanson, P.K., Lee, M.-C., and Marx, C.J. (2013).  
398 Development of an optimized medium, strain and high-throughput culturing methods for  
399 *Methylobacterium extorquens*. *PloS One* *8*, e62957.
- 400 Dittmann, E., Gugger, M., Sivonen, K., and Fewer, D.P. (2015). Natural Product Biosynthetic Diversity  
401 and Comparative Genomics of the Cyanobacteria. *Trends Microbiol.* *23*, 642–652.
- 402 Eberhard, A., Longin, T., Widrig, C.A., and Stranick, S.J. (1991). Synthesis of the *lux* gene autoinducer in  
403 *Vibrio fischeri* is positively autoregulated. *Arch. Microbiol.* *155*, 294–297.
- 404 Fedorov, D.N., Doronina, N.V., and Trotsenko, Y.A. (2011). Phytosymbiosis of aerobic methylobacteria:  
405 New facts and views. *Microbiology* *80*, 443–454.
- 406 Gibson, D.G., Young, L., Chuang, R.-Y., Venter, J.C., Hutchison, C.A., and Smith, H.O. (2009).  
407 Enzymatic assembly of DNA molecules up to several hundred kilobases. *Nat. Methods* *6*, 343–345.
- 408 Green, P.N., and Ardley, J.K. (2018). Review of the genus *Methylobacterium* and closely related  
409 organisms: a proposal that some *Methylobacterium* species be reclassified into a new genus,  
410 *Methylorubrum* gen. nov. *Int. J. Syst. Evol. Microbiol.* *68*, 2727–2748.
- 411 Gross, H., Stockwell, V.O., Henkels, M.D., Nowak-Thompson, B., Loper, J.E., and Gerwick, W.H.  
412 (2007). The Genomisotopic Approach: A Systematic Method to Isolate Products of Orphan Biosynthetic  
413 Gene Clusters. *Chem. Biol.* *14*, 53–63.
- 414 Hoang, T.T., Sullivan, S.A., Cusick, J.K., and Schweizer, H.P. (2002).  $\beta$ -Ketoacyl acyl carrier protein  
415 reductase (FabG) activity of the fatty acid biosynthetic pathway is a determining factor of 3-oxo-  
416 homoserine lactone acyl chain lengths. *Microbiology* *148*, 3849–3856.

- 417  
418 Kalyuzhnaya, M.G., Lapidus, A., Ivanova, N., Copeland, A.C., McHardy, A.C., Szeto, E., Salamov, A.,  
419 Grigoriev, I.V., Suci, D., Levine, S.R., Markowitz, V.M., Rigoutsos, I., Tringe, S.G., Bruce, D.C.,  
420 Richardson, P.M., Lidstrom, M.E., and Chistoserdova, L. (2008). High-resolution metagenomics targets  
421 specific functional types in complex microbial communities. *Nat. Biotechnol.* 26, 1029–1034.
- 422 Kinnel, R.B., Esquenazi, E., Leao, T., Moss, N., Mevers, E., Pereira, A.R., Monroe, E.A., Korobeynikov,  
423 A., Murray, T.F., Sherman, D., Gerwick, L., Dorrestein, P.C., and Gerwick, W.H. (2017). A  
424 Maldii isotopic Approach to Discover Natural Products: Cryptomaldamide, a Hybrid Tripeptide from the  
425 Marine Cyanobacterium *Moorea producens*. *J. Nat. Prod.* 80, 1514–1521.
- 426 Kleef, M.A.G. van, and Duine, J.A. (1988). L-tyrosine is the precursor of PQQ biosynthesis in  
427 *Hypomicrobium X*. *FEBS Lett.* 237, 91–97.
- 428 Klitgaard, A., Nielsen, J.B., Frandsen, R.J.N., Andersen, M.R., and Nielsen, K.F. (2015). Combining  
429 Stable Isotope Labeling and Molecular Networking for Biosynthetic Pathway Characterization. *Anal.*  
430 *Chem.* 87, 6520–6526.
- 431 Liao, L., Schaefer, A.L., Coutinho, B.G., Brown, P.J.B., and Greenberg, E.P. (2018). An aryl-homoserine  
432 lactone quorum-sensing signal produced by a dimorphic prosthecate bacterium. *Proc. Natl. Acad. Sci.*  
433 115, 7587–7592.
- 434 Lindemann, A., Pessi, G., Schaefer, A.L., Mattmann, M.E., Christensen, Q.H., Kessler, A., Hennecke, H.,  
435 Blackwell, H.E., Greenberg, E.P., and Harwood, C.S. (2011). Isovaleryl-homoserine lactone, an unusual  
436 branched-chain quorum-sensing signal from the soybean symbiont *Bradyrhizobium japonicum*. *Proc.*  
437 *Natl. Acad. Sci.* 108, 16765–16770.
- 438 Marx, C.J., Bringel, F., Chistoserdova, L., Moulin, L., Farhan Ul Haque, M., Fleischman, D.E., Gruffaz,  
439 C., Jourand, P., Knief, C., Lee, M.-C., et al. (2012). Complete genome sequences of six strains of the  
440 genus *Methylobacterium*. *J. Bacteriol.* 194, 4746–4748.
- 441 May, D.S., Crnkovic, C.M., Kronic, A., Wilson, T.A., Fuchs, J.R., and Orjala, J.E. (2020). <sup>15</sup>N Stable  
442 Isotope Labeling and Comparative Metabolomics Facilitates Genome Mining in Cultured Cyanobacteria.  
443 *ACS Chem. Biol.* 15, 758–765.
- 444 Moré, M.I., Finger, L.D., Stryker, J.L., Fuqua, C., Eberhard, A., and Winans, S.C. (1996). Enzymatic  
445 Synthesis of a Quorum-Sensing Autoinducer Through Use of Defined Substrates. *Science* 272, 1655–  
446 1658.
- 447 Morin, D., Grasland, B., Vallée-Réhel, K., Dufau, C., and Haras, D. (2003). On-line high-performance  
448 liquid chromatography–mass spectrometric detection and quantification of *N*-acylhomoserine lactones,  
449 quorum sensing signal molecules, in the presence of biological matrices. *J. Chromatogr. A* 1002, 79–92.
- 450 Myers, O.D., Sumner, S.J., Li, S., Barnes, S., and Du, X. (2017). One Step Forward for Reducing False  
451 Positive and False Negative Compound Identifications from Mass Spectrometry Metabolomics Data:  
452 New Algorithms for Constructing Extracted Ion Chromatograms and Detecting Chromatographic Peaks.  
453 *Anal. Chem.* 89, 8696–8703.
- 454 Newman, D.J., and Cragg, G.M. (2020). Natural Products as Sources of New Drugs over the Nearly Four  
455 Decades from 01/1981 to 09/2019. *J. Nat. Prod.* 83, 770–803.

- 456 Nieto Penalver, C.G., Morin, D., Cantet, F., Saurel, O., Milon, A., and Vorholt, J.A. (2006).  
457 *Methylobacterium extorquens* AM1 produces a novel type of acyl-homoserine lactone with a double  
458 unsaturated side chain under methylotrophic growth conditions. *FEBS Lett.* *580*, 561–567.
- 459 Nisbet, E.G., Dlugokencky, E.J., and Bousquet, P. (2014). Atmospheric science. Methane on the rise--  
460 again. *Science* *343*, 493–495.
- 461 Nothias, L.F., Petras, D., Schmid, R., Dührkop, K., Rainer, J., Sarvepalli, A., Protsyuk, I., Ernst, M.,  
462 Tsugawa, H., Fleischauer, M., et al. (2020). Feature-based molecular networking in the GNPS analysis  
463 environment. *Nat. Methods* *17*, 905–908.
- 464 Papenfort, K., and Bassler, B.L. (2016). Quorum sensing signal–response systems in Gram-negative  
465 bacteria. *Nat. Rev. Microbiol.* *14*, 576–588.
- 466 Patel, N.M., Moore, J.D., Blackwell, H.E., and Amador-Noguez, D. (2016). Identification of  
467 Unanticipated and Novel *N*-Acyl *L*-Homoserine Lactones (AHLs) Using a Sensitive Non-Targeted LC-  
468 MS/MS Method. *PLoS One.* *11*, e0163469.
- 469 Pérez-Montaña, F., Guasch-Vidal, B., González-Barroso, S., López-Baena, F.J., Cubo, T., Ollero, F.J.,  
470 Gil-Serrano, A.M., Rodríguez-Carvajal, M.Á., Bellogín, R.A., and Espuny, M.R. (2011). Nodulation-  
471 gene-inducing flavonoids increase overall production of autoinducers and expression of *N*-acyl  
472 homoserine lactone synthesis genes in rhizobia. *Res. Microbiol.* *162*, 715–723.
- 473 Pluskal, T., Castillo, S., Villar-Briones, A., and Orešič, M. (2010). MZmine 2: Modular framework for  
474 processing, visualizing, and analyzing mass spectrometry-based molecular profile data. *BMC*  
475 *Bioinformatics* *11*, 395.
- 476 Poonguzhali, S., Madhaiyan, M., and Sa, T. (2007). Production of acyl-homoserine lactone quorum-  
477 sensing signals is wide-spread in Gram-negative *Methylobacterium*. *J. Microbiol. Biotechnol.* *17*, 226-  
478 233.
- 479 Puri, A.W. (2019). Specialized Metabolites from Methylotrophic Proteobacteria. *Curr. Issues Mol. Biol.*  
480 211–224.
- 481 Puri, A.W., Schaefer, A.L., Fu, Y., Beck, D.A.C., Greenberg, E.P., and Lidstrom, M.E. (2017). Quorum  
482 Sensing in a Methane-Oxidizing Bacterium. *J. Bacteriol.* *199*, e00773-16.
- 483 Radajewski, S., Ineson, P., Parekh, N.R., and Murrell, J.C. (2000). Stable-isotope probing as a tool in  
484 microbial ecology. *Nature* *403*, 646–649.
- 485 Schaefer, A.L., Val, D.L., Hanzelka, B.L., Cronan, J.E., and Greenberg, E.P. (1996). Generation of cell-  
486 to-cell signals in quorum sensing: acyl homoserine lactone synthase activity of a purified *Vibrio fischeri*  
487 LuxI protein. *Proc. Natl. Acad. Sci.* *93*, 9505–9509.
- 488 Schaefer, A.L., Greenberg, E.P., Oliver, C.M., Oda, Y., Huang, J.J., Bittan-Banin, G., Peres, C.M.,  
489 Schmidt, S., Juhaszova, K., Sufrin, J.R., et al. (2008). A new class of homoserine lactone quorum-sensing  
490 signals. *Nature* *454*, 595–599.
- 491 Schaefer, A.L., Harwood, C.S., and Greenberg, E.P. (2018). “Hot Stuff”: The Many Uses of a Radiolabel  
492 Assay in Detecting Acyl-Homoserine Lactone Quorum-Sensing Signals. In *Quorum Sensing*, L. Leoni,  
493 and G. Rampioni, eds. (New York, NY: Springer New York), pp. 35–47.



- 494 Simon, R., Prierer, U., and Pühler, A. (1983). A Broad Host Range Mobilization System for *in vivo*  
495 Genetic Engineering: Transposon Mutagenesis in Gram Negative Bacteria. *Nat Biotechnol* *1*, 784–791.
- 496 Singh, B.K., Bardgett, R.D., Smith, P., and Reay, D.S. (2010). Microorganisms and climate change:  
497 terrestrial feedbacks and mitigation options. *Nat. Rev. Microbiol.* *8*, 779–790.
- 498 Stein, L.Y., and Klotz, M.G. (2016). The nitrogen cycle. *Curr. Biol.* *26*, R94–R98.
- 499 Thornhill, S.G., and McLean, R.J.C. (2018). Use of Whole-Cell Bioassays for Screening Quorum  
500 Signaling, Quorum Interference, and Biofilm Dispersion. In *Quorum Sensing*, L. Leoni, and G. Rampioni,  
501 eds. (New York, NY: Springer New York), pp. 3–24.
- 502 Val, D.L., and Cronan, J.E. (1998). *in vivo* Evidence that *S*-Adenosylmethionine and Fatty Acid Synthesis  
503 Intermediates Are the Substrates for the LuxI Family of Autoinducer Synthases. *J. Bacteriol.* *180*, 2644–  
504 2651.
- 505 Volpe, J.J., and Vagelos, P.R. (1976). Mechanisms and regulation of biosynthesis of saturated fatty acids.  
506 *Physiol. Rev.* *56*, 339–417.
- 507 Whiteley, M., Diggle, S.P., and Greenberg, E.P. (2017). Progress in and promise of bacterial quorum  
508 sensing research. *Nature* *551*, 313–320.
- 509 Whittenbury, R., Phillips, K.C., and Wilkinson, J.F. (1970). Enrichment, isolation and some properties of  
510 methane-utilizing bacteria. *J. Gen. Microbiol.* *61*, 205–218.
- 511
